# Supplementary material
Source: HighWire-hosted journal article supplement (https://www.cmajopen.ca/highwire/filestream/87915/field_highwire_adjunct_files/1/2021-0095-2-at.pdf)
Supplement: 2021-0095-2-at.pdf [file 2021-0095-2-at.pdf]

Appendix 2. Incidence rate ratios, 95% confidence intervals and P-values for antibiotic prescriptions per 1000 population per year using Poisson models.

| Parameter                                         | IRR (95% CI)     | P-value |
|---------------------------------------------------|------------------|---------|
| <b>Overall – Crude</b>                            |                  | <.0001  |
| Alberta                                           | 1.06 (0.95-1.17) |         |
| British Columbia                                  | 0.87 (0.75-0.98) |         |
| Manitoba                                          | 1.02 (0.91-1.13) |         |
| New Brunswick                                     | 1.02 (0.91-1.13) |         |
| Newfoundland and Labrador                         | 1.47 (1.37-1.57) |         |
| Nova Scotia                                       | 1.04 (0.93-1.15) |         |
| Ontario                                           | 1.02 (0.91-1.13) |         |
| Prince Edward Island                              | 1.03 (0.92-1.14) |         |
| Québec                                            | 0.97 (0.86-1.08) |         |
| Saskatchewan                                      | 1.14 (1.03-1.24) |         |
| <b>Overall – Age-adjusted</b>                     |                  | <.0001  |
| Alberta                                           | 1.08 (0.97-1.19) |         |
| British Columbia                                  | 0.84 (0.73-0.96) |         |
| Manitoba                                          | 1.05 (0.92-1.14) |         |
| New Brunswick                                     | 1.00 (0.89-1.11) |         |
| Newfoundland and Labrador                         | 1.45 (1.35-1.55) |         |
| Nova Scotia                                       | 1.01 (0.90-1.12) |         |
| Ontario                                           | 1.02 (0.91-1.13) |         |
| Prince Edward Island                              | 1.00 (0.90-1.12) |         |
| Québec                                            | 0.95 (0.84-1.06) |         |
| Saskatchewan                                      | 1.14 (1.04-1.25) |         |
| <b>Fluoroquinolones</b>                           |                  | <.0001  |
| Alberta                                           | 0.84 (0.45-1.22) |         |
| British Columbia                                  | 0.75 (0.35-1.14) |         |
| Manitoba                                          | 0.94 (0.57-1.31) |         |
| New Brunswick                                     | 0.79 (0.39-1.18) |         |
| Newfoundland and Labrador                         | 1.52 (1.19-1.86) |         |
| Nova Scotia                                       | 0.77 (0.38-1.17) |         |
| Ontario                                           | 0.91 (0.54-1.29) |         |
| Prince Edward Island                              | 0.70 (0.30-1.11) |         |
| Québec                                            | 1.45 (1.11-1.79) |         |
| Saskatchewan                                      | 0.84 (0.45-1.22) |         |
| <b>Macrolides</b>                                 |                  | <.0001  |
| Alberta                                           | 1.03 (0.73-1.32) |         |
| British Columbia                                  | 0.66 (0.33-0.99) |         |
| Manitoba                                          | 0.99 (0.69-1.29) |         |
| New Brunswick                                     | 0.85 (0.54-1.16) |         |
| Newfoundland and Labrador                         | 1.43 (1.16-1.70) |         |
| Nova Scotia                                       | 0.68 (0.36-1.01) |         |
| Ontario                                           | 1.02 (0.73-1.31) |         |
| Prince Edward Island                              | 0.89 (0.59-1.20) |         |
| Québec                                            | 1.20 (0.91-1.48) |         |
| Saskatchewan                                      | 1.00 (0.70-1.29) |         |
| <b>Penicillins with beta-lactamase inhibitors</b> |                  | 0.2743  |
| Alberta                                           | 1.13 (0.74-1.52) |         |
| British Columbia                                  | 0.86 (0.44-1.28) |         |
| Manitoba                                          | 1.01 (0.61-1.41) |         |
| New Brunswick                                     | 1.22 (0.84-1.61) |         |
| Newfoundland and Labrador                         | 1.48 (1.11-1.84) |         |
| Nova Scotia                                       | 0.97 (0.56-1.37) |         |
| Ontario                                           | 0.90 (0.49-1.32) |         |
| Prince Edward Island                              | 1.06 (0.67-1.46) |         |
| Québec                                            | 1.13 (0.74-1.52) |         |
| Saskatchewan                                      | 1.13 (0.74-1.52) |         |
| <b>Children</b>                                   |                  | <.0001  |
| Alberta                                           | 1.09 (0.97-1.20) |         |
| British Columbia                                  | 0.77 (0.65-0.90) |         |
| Manitoba                                          | 1.09 (0.97-1.21) |         |
| New Brunswick                                     | 1.11 (1.00-1.23) |         |
| Newfoundland and Labrador                         | 1.83 (1.73-1.94) |         |
| Nova Scotia                                       | 1.04 (0.92-1.16) |         |
| Ontario                                           | 0.96 (0.84-1.08) |         |
| Prince Edward Island                              | 1.18 (1.06-1.29) |         |
| Québec                                            | 1.04 (0.92-1.16) |         |
| Saskatchewan                                      | 1.24 (1.12-1.35) |         |
| <b>Adults</b>                                     |                  | <.0001  |
| Alberta                                           | 1.10 (0.99-1.22) |         |
| British Columbia                                  | 0.88 (0.76-1.00) |         |
| Manitoba                                          | 1.07 (0.96-1.19) |         |
| New Brunswick                                     | 1.03 (0.91-1.14) |         |
| Newfoundland and Labrador                         | 1.44 (1.33-1.55) |         |
| Nova Scotia                                       | 1.02 (0.90-1.14) |         |
| Ontario                                           | 1.00 (0.89-1.12) |         |
| Prince Edward Island                              | 0.99 (0.87-1.10) |         |
| Québec                                            | 0.95 (0.84-1.07) |         |
| Saskatchewan                                      | 1.19 (1.07-1.30) |         |
| <b>Older Adults</b>                               |                  | <.0001  |
| Alberta                                           | 1.04 (0.95-1.13) |         |
| British Columbia                                  | 0.86 (0.76-0.95) |         |
| Manitoba                                          | 0.90 (0.81-0.99) |         |
| New Brunswick                                     | 0.89 (0.80-0.99) |         |
| Newfoundland and Labrador                         | 1.29 (1.20-1.37) |         |
| Nova Scotia                                       | 1.00 (0.91-1.09) |         |
| Ontario                                           | 1.10 (1.01-1.19) |         |
| Prince Edward Island                              | 0.98 (0.89-1.07) |         |
| Québec                                            | 0.93 (0.84-1.02) |         |
| Saskatchewan                                      | 1.01 (0.92-1.10) |         |

IRR = incidence rate ratio; CI = Confidence Interval.

Note: the referent in all of the above models was the corresponding national dispensing rate.
